# Supplementary material for: CCND1 Amplification Profiling Identifies a Subtype of Melanoma Associated With Poor Survival and an Immunosuppressive Tumor Microenvironment
Source: PubMed Central journal article supplement (PMC9285001; doi:10.3389/fimmu.2022.725679), 2022-07-01
Supplement: DataSheet_1.pdf [file DataSheet_1.pdf]

Supplementary materials

Figure S1. The overlap among CCND1, GAB2, and PAK1 amplification (A) and high amplification (B) in the TCGA-melanoma patients.

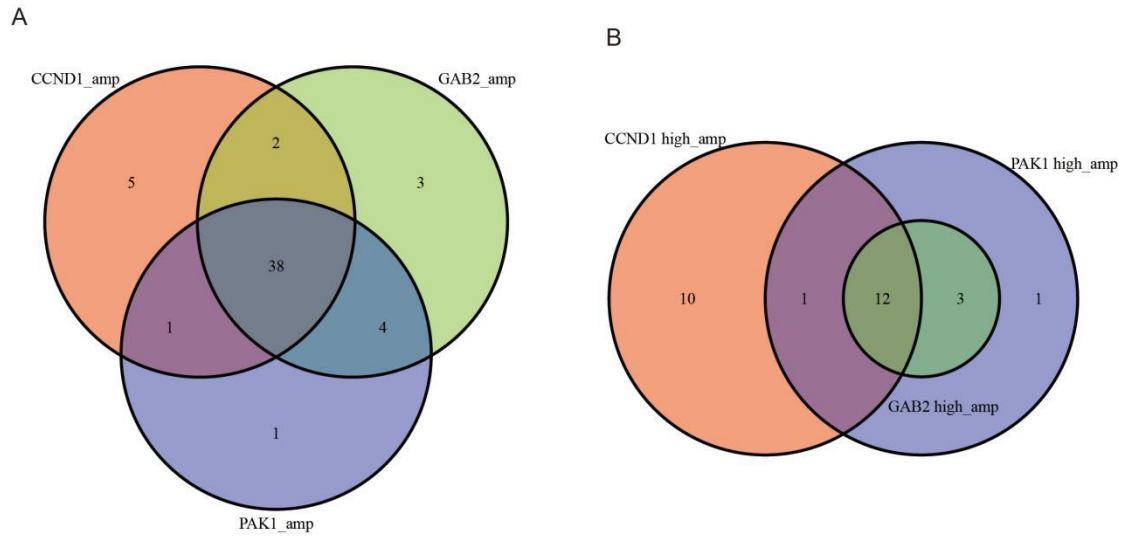

Figure S2: The CCND1 mRNA expression quantified by qPCR.

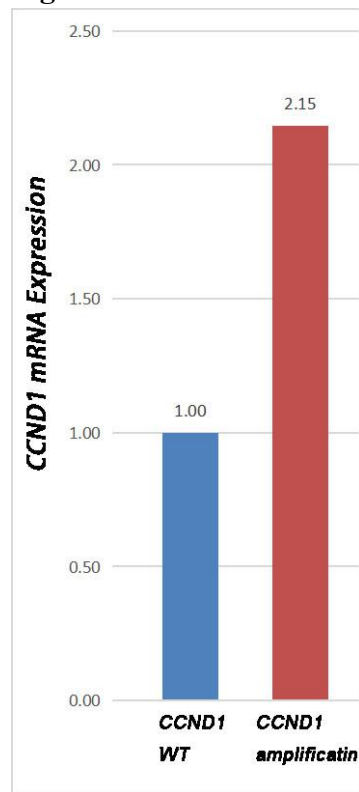

Table S1. Univariate analysis of factors influencing ICIs response.

|                                          | Univariate analysis   |       |
|------------------------------------------|-----------------------|-------|
|                                          | Hazard ratio (95% CI) | P     |
| MSKCC-IO cohort (n=1105)                 |                       |       |
| CCND1 Amplification (+2) VS. Neutral (0) | 1.626 (1.086-2.434)   | 0.002 |

|                                          |                     |        |
|------------------------------------------|---------------------|--------|
| FGF3 Amplification (+2) VS. Neutral (0)  | 1.756 (1.137-2.713) | <0.001 |
| FGF4 Amplification (+2) VS. Neutral (0)  | 1.756 (1.137-2.713) | <0.001 |
| FGF19 Amplification (+2) VS. Neutral (0) | 1.774 (1.153-2.730) | <0.001 |

**Table S2. Characteristics of 14 patients with *CCND1* amplification in the MSKCC-IO cohort**

| Characteristics              | <i>CCND1</i> -Amplification<br>(n=14) |
|------------------------------|---------------------------------------|
| Sex, n (%)                   |                                       |
| Male                         | 11 (78.6)                             |
| Female                       | 3 (21.4)                              |
| Age (y), n (%)               |                                       |
| ≤60                          | 6 (42.9)                              |
| >60                          | 8 (57.1)                              |
| Normalized mutation count    |                                       |
| Top 20% of each histology    | 4 (28.6)                              |
| Bottom 80% of each histology | 10 (71.4)                             |
| Drug Class                   |                                       |
| PD-1/PD-L1                   | 6 (42.8)                              |
| CTLA-4                       | 4 (28.6)                              |
| Combination                  | 4 (28.6)                              |
| Year of ICI start            |                                       |
| 2011-2012                    | 2 (14.3)                              |
| 2013-2014                    | 2 (14.3)                              |
| 2015-2017                    | 10 (71.4)                             |

CTLA-4, cytotoxic T-lymphocyte-associated protein 4; ICI, immune checkpoint inhibitors; MSKCC, the Memorial Sloan Kettering Cancer Center; MSKCC-IO, patients in the MSKCC cohort who had received at least one dose of immune checkpoint inhibitor; PD-1, programmed death-1; PD-L1, programmed death ligand-1.

**Table S3. Multivariable analysis of factors associated with overall survival in 231 patients in the MSKCC-IO cohort**

| Variable                            | OS       |              |             |
|-------------------------------------|----------|--------------|-------------|
|                                     | <i>P</i> | Hazard ratio | 95% CI      |
| <i>CCND1</i> copy number alteration | 0.006    | 2.439        | 1.297-4.587 |

MSKCC, the Memorial Sloan Kettering Cancer Center; MSKCC-IO, patients in the MSKCC cohort who had received at least one dose of immune checkpoint inhibitor; OS, overall survival.
